# Supplementary material
Source: publisher site journal article supplement (https://www.spandidos-publications.com/6999/downloadSupplementary)
Supplement: Supplementary file 1 [file downloadSupplementary]

## Sheet: SVI-MSIPeak-MSISensor-Mantis
Table SVI. Comparision of MSIPeak with MANTIS and MSISensor2. MMR, mismatch repair; dMMR, MMR deficiency; pMMR, MMR proficieny; MSI, microsatellite instability; MSI-H, high MSI; MSS, microsatellite stability; IHC, immunohistochemical.
Sample no.	MSIPeak	Consistency between MSIPeak and MANTIS	MANTIS					MSISensor2				Consistency between MSIPeak and MSISensor2	IHC
			DIF		DIF_Threshold	Status	MANTIS	Total_Number_of_Sites	Number_of_Somatic_Sites	Percent	Status		IHC-result	IHC-MSISensor2	IHC-MANTIS	IHC-MSIPeak
A101	MSI-H	No	0.3063		0.4	Stable	MSS	7688	845	11.11	MSS	No	dMMR	No	No	Yes
A102	MSI-H	Yes	0.4855		0.4	Unstable	MSI-H	7619	2286	30	MSI-H	Yes	dMMR	Yes	Yes	Yes
A45	MSS	Yes	0.2247		0.4	Stable	MSS	7427	361	4.86	MSS	Yes	pMMR	Yes	Yes	Yes
A48	MSS	Yes	0.2899		0.4	Stable	MSS	7729	255	3.3	MSS	Yes	pMMR	Yes	Yes	Yes
A49	MSI-H	Yes	0.4734		0.4	Unstable	MSI-H	7822	2465	31.51	MSI-H	Yes	dMMR	Yes	Yes	Yes
A50	MSI-H	Yes	0.5022		0.4	Unstable	MSI-H	7953	2294	28.91	MSI-H	Yes	dMMR	Yes	Yes	Yes
A54	MSI-H	No	0.3778		0.4	Stable	MSS	7752	1926	24.85	MSI-H	Yes	dMMR	Yes	No	Yes
A57	MSS	Yes	0.2473		0.4	Stable	MSS	7746	470	6.07	MSS	Yes	pMMR	Yes	Yes	Yes
A59	MSS	Yes	0.2522		0.4	Stable	MSS	8196	115	1.4	MSS	Yes	pMMR	Yes	Yes	Yes
A62	MSS	Yes	0.2049		0.4	Stable	MSS	7587	123	1.62	MSS	Yes	pMMR	Yes	Yes	Yes
A65	MSS	Yes	0.1887		0.4	Stable	MSS	8401	65	0.77	MSS	Yes	pMMR	Yes	Yes	Yes
A67	MSS	Yes	0.2559		0.4	Stable	MSS	7962	9	0.11	MSS	Yes	pMMR	Yes	Yes	Yes
A72	MSS	Yes	0.1909		0.4	Stable	MSS	6812	152	2.23	MSS	Yes	pMMR	Yes	Yes	Yes
A73	MSS	Yes	0.1878		0.4	Stable	MSS	8059	51	0.63	MSS	Yes	pMMR	Yes	Yes	Yes
A75	MSS	Yes	0.2114		0.4	Stable	MSS	7497	137	1.83	MSS	Yes	pMMR	Yes	Yes	Yes
A76	MSS	Yes	0.2664		0.4	Stable	MSS	7172	75	1.05	MSS	Yes	pMMR	Yes	Yes	Yes
A85	MSS	Yes	0.1842		0.4	Stable	MSS	8348	61	0.73	MSS	Yes	pMMR	Yes	Yes	Yes
A87	MSS	Yes	0.2516		0.4	Stable	MSS	7887	284	3.6	MSS	Yes	pMMR	Yes	Yes	Yes
A88	MSS	Yes	0.1799		0.4	Stable	MSS	7588	203	2.68	MSS	Yes	pMMR	Yes	Yes	Yes
A89	MSI-H	No	0.3451		0.4	Stable	MSS	7070	1301	18.4	MSS	No	dMMR	No	No	Yes
A92	MSS	Yes	0.2986		0.4	Stable	MSS	5982	20	0.33	MSS	Yes	pMMR	Yes	Yes	Yes
A94	MSS	Yes	0.1935		0.4	Stable	MSS	7780	261	3.35	MSS	Yes	pMMR	Yes	Yes	Yes
A95	MSI-H	Yes	0.4694		0.4	Unstable	MSI-H	8205	2645	32.24	MSI-H	Yes	dMMR	Yes	Yes	Yes
A96	MSI-H	Yes	0.5931		0.4	Unstable	MSI-H	7934	2648	33.38	MSI-H	Yes	dMMR	Yes	Yes	Yes
A97	MSS	Yes	0.2316		0.4	Stable	MSS	7716	288	3.73	MSS	Yes	pMMR	Yes	Yes	Yes
IHC		MSIPeak (100%)	MSISensor2 (92%)	MANTIS (88%)
	Count
dMMR	8	8	6	5
pMMR	17	17	19	20
